# Supplementary material for: Complexation between pentiptycene-based mono(crown ether)s and tetracationic cyclobis(paraquat-p-phenylene): who is the host or the guest?
Source: Royal Society of Chemistry journal article supplement (doi:10.1039/b924550b), 2010-01-01
Supplement: b924550b.pdf [file b924550b.pdf]

## Electronic Supplementary Information

### Complexation between pentiptycene-based mono(crown ether)s and tetracationic cyclobis(paraquat-*p*-phenylene): who is the host or the guest?

Jing Cao,<sup>ab</sup> Hai-Yan Lu,<sup>b</sup> Jun-Feng Xiang<sup>a</sup> and Chuan-Feng Chen<sup>\*a</sup>

<sup>a</sup>Beijing National Laboratory for Molecular Sciences, Institute of Chemistry, Chinese Academy of Sciences, Beijing 100190, China. <sup>b</sup>Graduate School, Chinese Academy of Sciences, Beijing 100049, China.

E-mail: cchen@iccas.ac.cn

### Contents

|                                                                                                              |     |
|--------------------------------------------------------------------------------------------------------------|-----|
| 1. Synthetic procedure for compound <b>2</b> -----                                                           | S2  |
| 2. <sup>1</sup> H NMR and <sup>13</sup> C NMR spectra of compound <b>2</b> -----                             | S4  |
| 3. The comparison of <sup>1</sup> H NMR spectra between <b>2</b> and <b>3</b> -----                          | S5  |
| 4. <sup>3</sup> <sup>1</sup> H- <sup>1</sup> H COSY spectra of the complexes <b>1·3</b> and <b>2·3</b> ----- | S6  |
| 5. ROESY spectra of the complexes <b>1·3</b> and <b>2·3</b> -----                                            | S8  |
| 6. Determination of the association constants-----                                                           | S10 |
| 7. <sup>1</sup> H NMR spectra of complexes <b>1·3</b> and <b>2·3</b> at low temperature-----                 | S13 |
| 8. ESI-MS spectra of the complexes <b>1·3</b> and <b>2·3</b> -----                                           | S15 |
| 9. Cyclic voltammetry (CV) curves-----                                                                       | S16 |
| 10. References-----                                                                                          | S16 |

## 1. Synthetic procedure for compound 2

**General methods.** Melting points, taken on an electrothermal melting point apparatus, are uncorrected.  $^1\text{H}$  NMR,  $^{13}\text{C}$  NMR and  $^1\text{H}$ - $^1\text{H}$  COSY spectra were recorded on a DMX300 NMR, while  $^1\text{H}$ - $^1\text{H}$  ROESY spectra were recorded on an AVANCE 600 NMR. MALDI-TOF mass spectra were obtained on a BIFLEXIII mass spectrometer. Elemental analyses were performed by the Analytical Laboratory of Institute of Chemistry, CAS. Materials obtained commercially were used without further purification. Compounds **1**,<sup>S1</sup> bistosylate **5**,<sup>S2</sup> and cyclobis(paraquat-*p*-phenylene) tetra(hexafluorophosphate) **3**<sup>S3</sup> were prepared according to literature procedures. The association constant for the complexes **1**·**3** and **2**·**3** were determined according to the literature method.<sup>S4</sup>

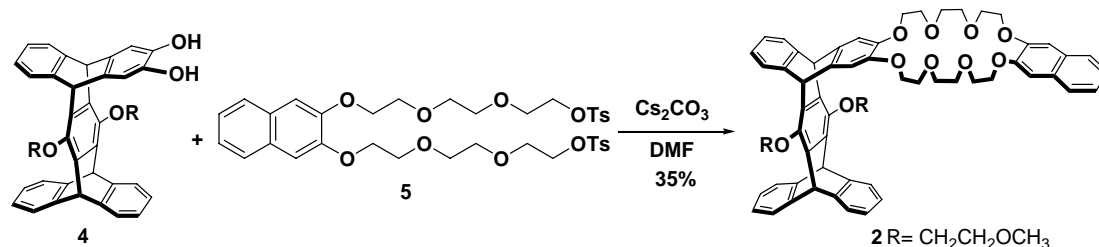

**Compound 2.** A suspension of cesium carbonate (1.33 g, 4.06 mmol) in anhydrous DMF (70 mL) under argon atmosphere was stirred vigorously for 10 min and then heated to 100 °C. To the mixture was added dropwise a solution of **4** (0.60 g, 0.98 mmol) and bistosylate **5** (0.72 g, 0.98 mmol) in anhydrous DMF (70 mL) over 12h. The reaction mixture was stirred at 100 °C for another 3d. After cooling down to ambient temperature, the mixture was filtered and washed with  $\text{CH}_2\text{Cl}_2$  (60 mL). The filtrate was concentrated under reduced pressure to give a gray solid, which was

dissolved in CH<sub>2</sub>Cl<sub>2</sub> (250 mL) and washed with diluted HCl. The organic layer was dried over anhydrous sodium sulfate. Removal of the solvent, the resulting oil was subjected to successive column chromatography over silica gel (eluent: 150:1 CH<sub>2</sub>Cl<sub>2</sub>/CH<sub>3</sub>OH and then 100:1 CH<sub>2</sub>Cl<sub>2</sub>/CH<sub>3</sub>OH) 0.35 g (35 %) of **2** as an off-white solid was obtained. Mp: 82-83 °C. <sup>1</sup>H NMR (300 MHz, 1:1 CD<sub>3</sub>CN/CDCl<sub>3</sub>): δ 3.67 (s, 6H), 3.74-3.76 (m, 4H), 3.78-3.82 (m, 8H), 3.85-3.92 (m, 8H), 4.01-4.06 (m, 8H), 4.17-4.19 (m, 8H), 5.63 (s, 2H), 5.74 (s, 2H), 6.89-6.93 (m, 8H), 7.06 (s, 2H), 7.27-7.34 (m, 8H), 7.62-7.65 (m, 2H). <sup>13</sup>C NMR (75 MHz, CD<sub>3</sub>CN): δ 47.7, 48.1, 59.4, 69.2, 69.7, 69.9, 70.0, 71.1, 71.4, 71.9, 74.9, 108.0, 111.7, 123.3, 123.5, 123.6, 124.1, 125.0, 125.1, 126.3, 129.3, 136.4, 136.8, 138.8, 145.4, 145.5, 145.8, 145.9, 146.0, 149.1. MALDI-TOF MS: *m/z* 998.9 [M]<sup>+</sup>, 1021.9 [M+Na]<sup>+</sup>, 1037.9 [M+K]<sup>+</sup>. Anal. Calcd for C<sub>62</sub>H<sub>62</sub>O<sub>12</sub>·H<sub>2</sub>O: C, 73.21; H, 6.34. Found: C, 73.38; H, 6.33.

## 2. $^1\text{H}$ NMR and $^{13}\text{C}$ NMR spectra of compound 2

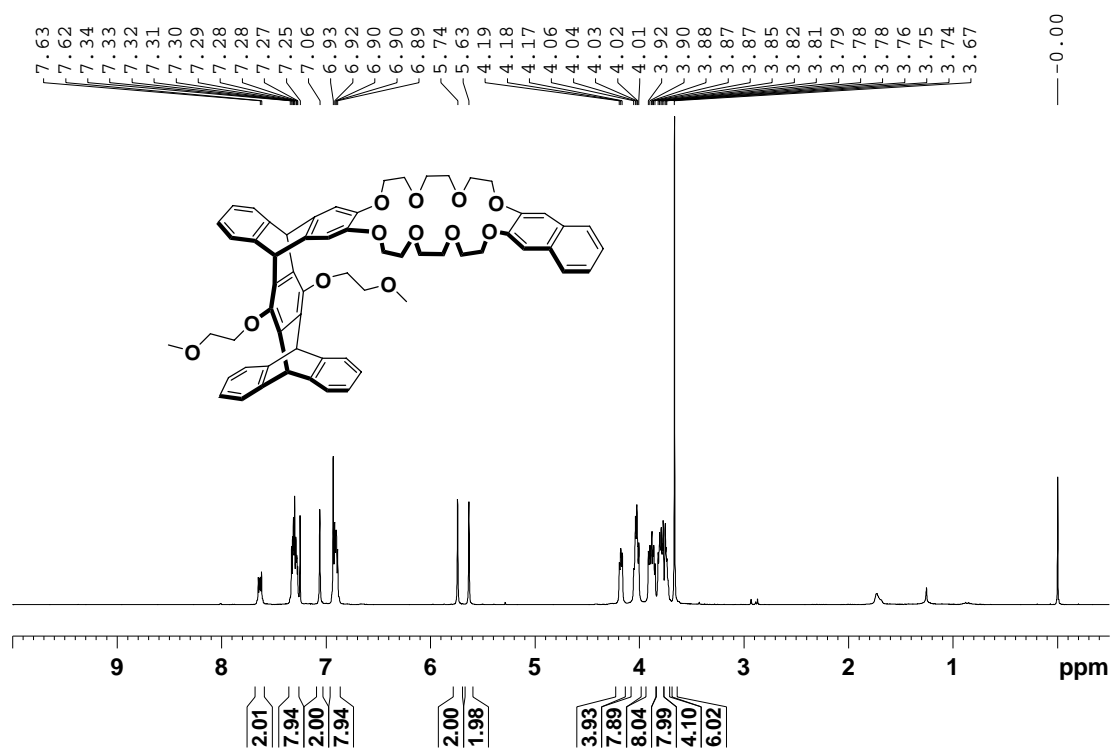

Fig. S1  $^1\text{H}$  NMR spectrum (300 MHz,  $\text{CDCl}_3$ ) of 2.

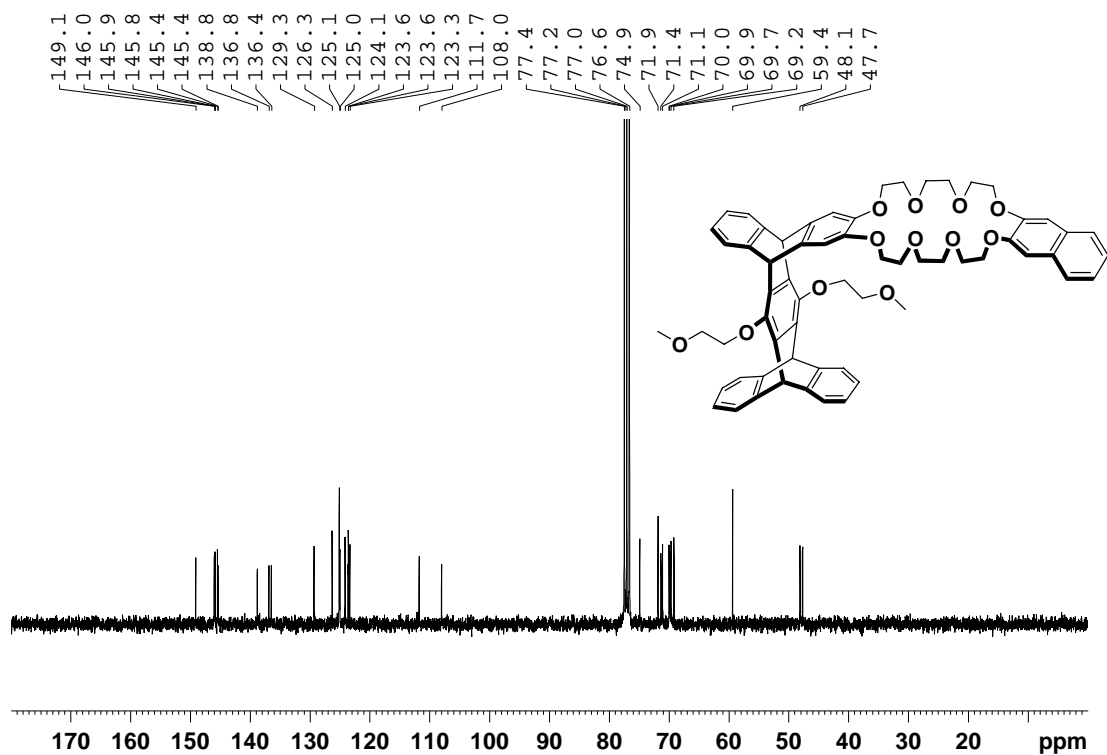

Fig. S2  $^{13}\text{C}$  NMR spectrum (75 MHz,  $\text{CDCl}_3$ ) of 2.

### 3. The comparison of $^1\text{H}$ NMR spectra between 2 and 3

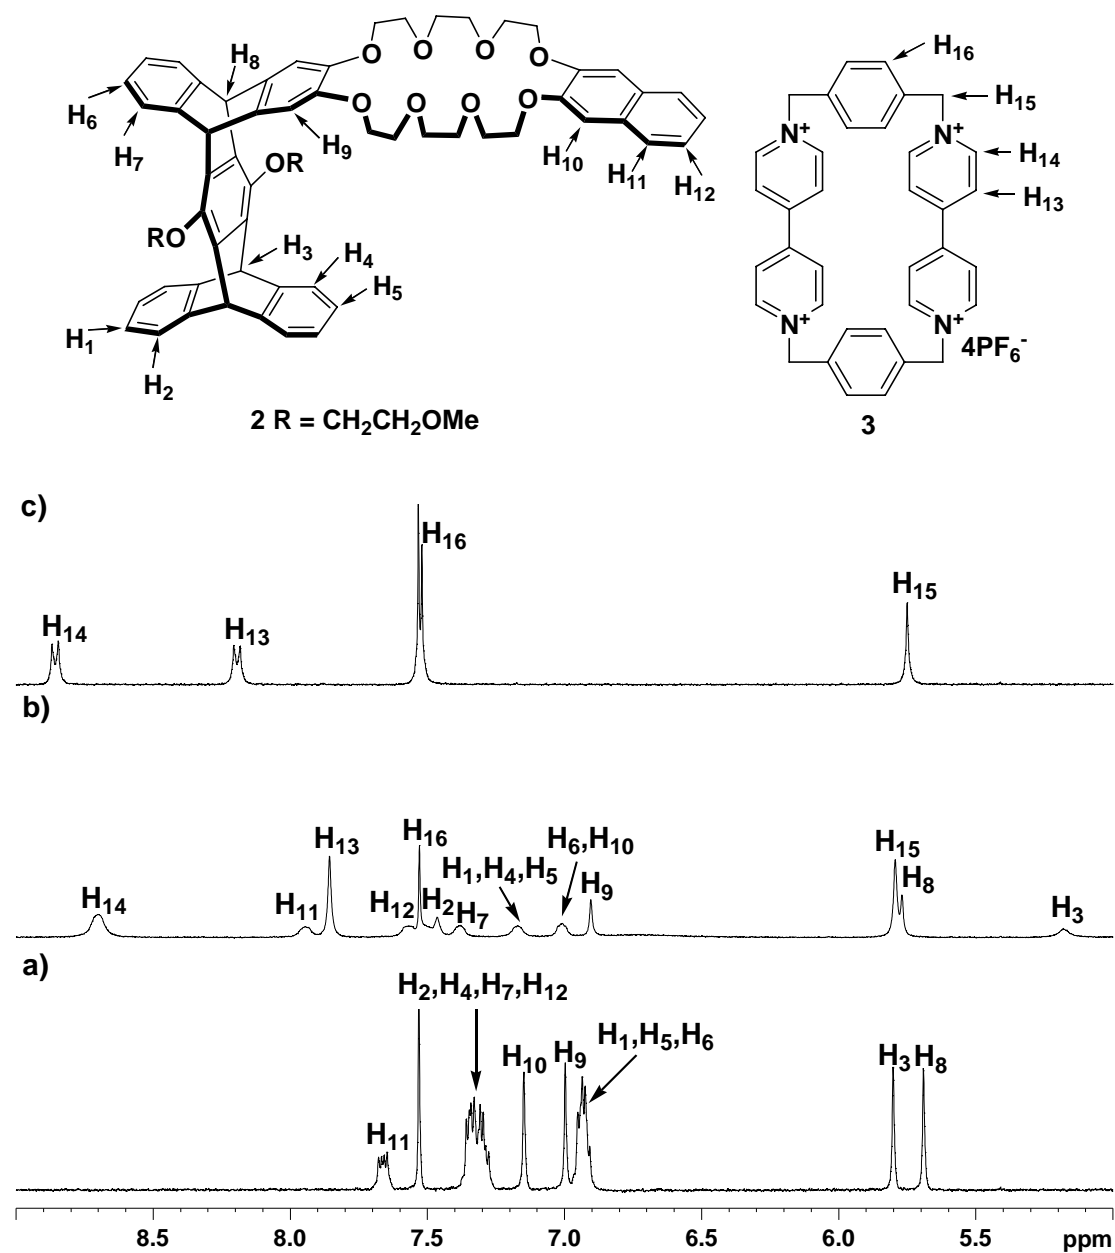

**Fig. S3** Partial  $^1\text{H}$  NMR spectra (300 MHz,  $\text{CD}_3\text{CN}/\text{CDCl}_3=2$ , 298 K) of (a) free 2, (b) 2 and 1.0 equiv of 3, (c) free 3.  $[\text{2}] = 2.0$  mM.

#### 4. $^1\text{H}$ - $^1\text{H}$ COSY spectra of the complexes 1-3 and 2-3

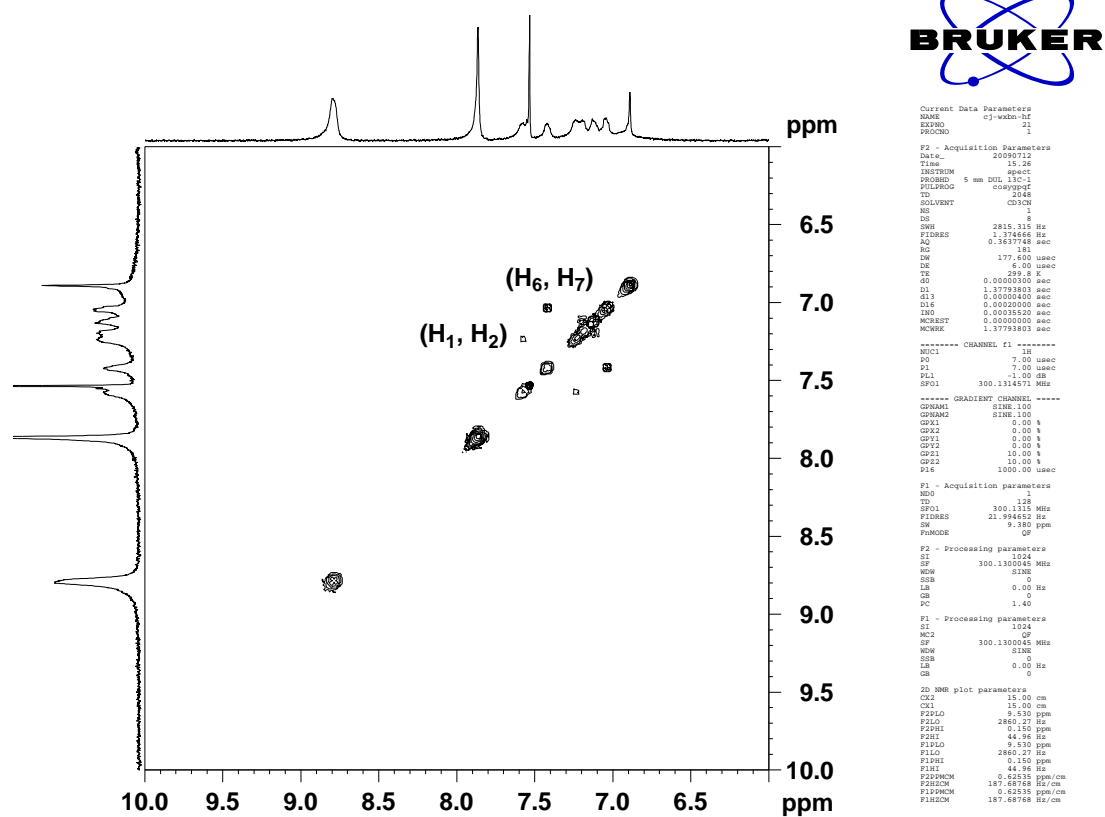

**Fig. S4**  $^1\text{H}$ - $^1\text{H}$  COSY spectrum (300 MHz,  $\text{CD}_3\text{CN}/\text{CDCl}_3=2$ ) of **1** and 1 equiv of **3**.  
[**1**] $_0$  = 2 mM.

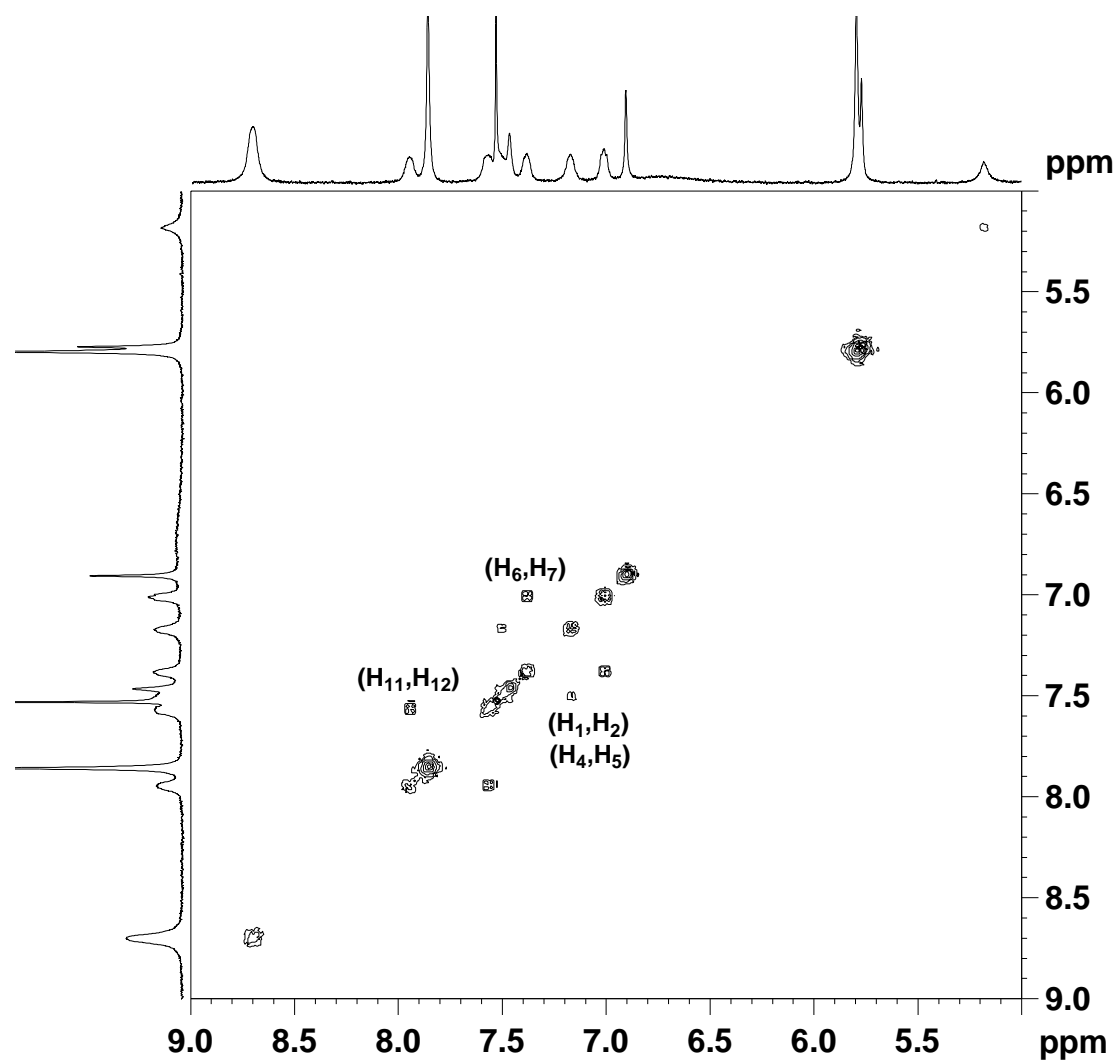

**Fig. S5**  $^1\text{H}$ - $^1\text{H}$  COSY spectrum (300 MHz,  $\text{CD}_3\text{CN}/\text{CDCl}_3=2$ ) of **2** and 1 equiv of **3**.  
[**2**] $_0$  = 2 mM.

## 5. ROESY spectra of the complexes 1-3 and 2-3

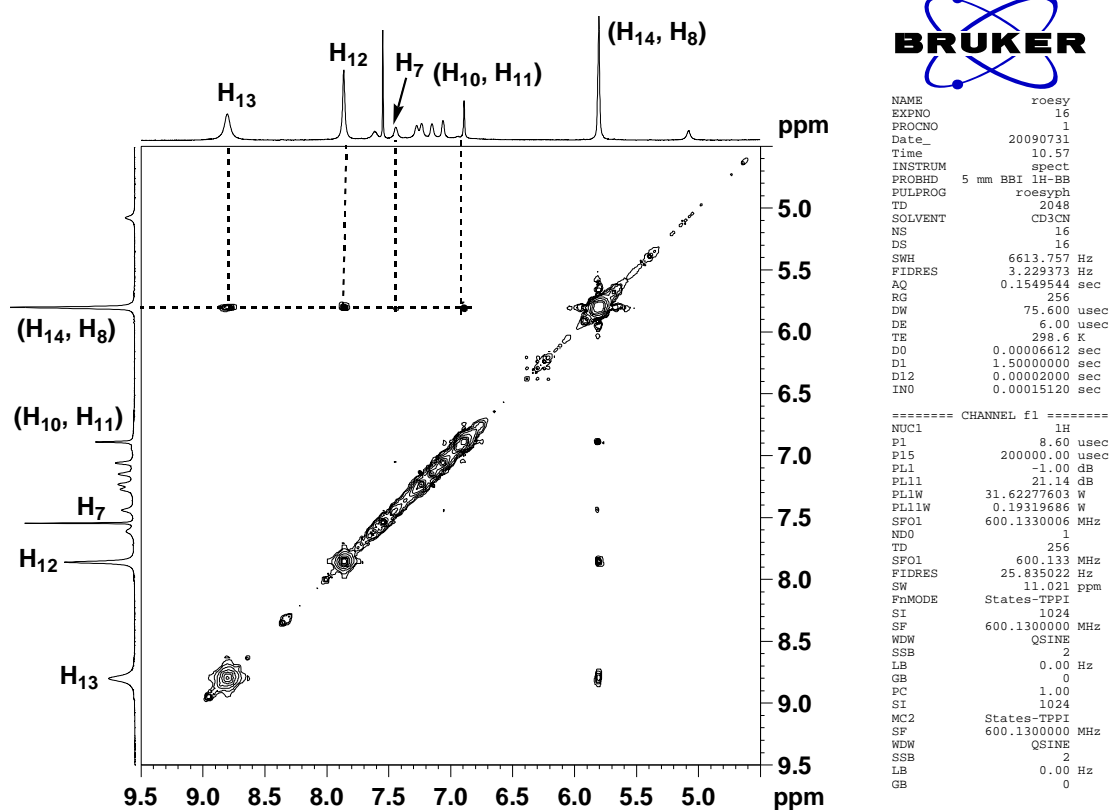

**Fig. S6**  $^1\text{H}$ - $^1\text{H}$  ROESY spectrum (600 MHz,  $\text{CD}_3\text{CN}/\text{CDCl}_3=2$ ) of **1** and 1 equiv of **3**.  $[\mathbf{1}]_0 = 2$  mM.



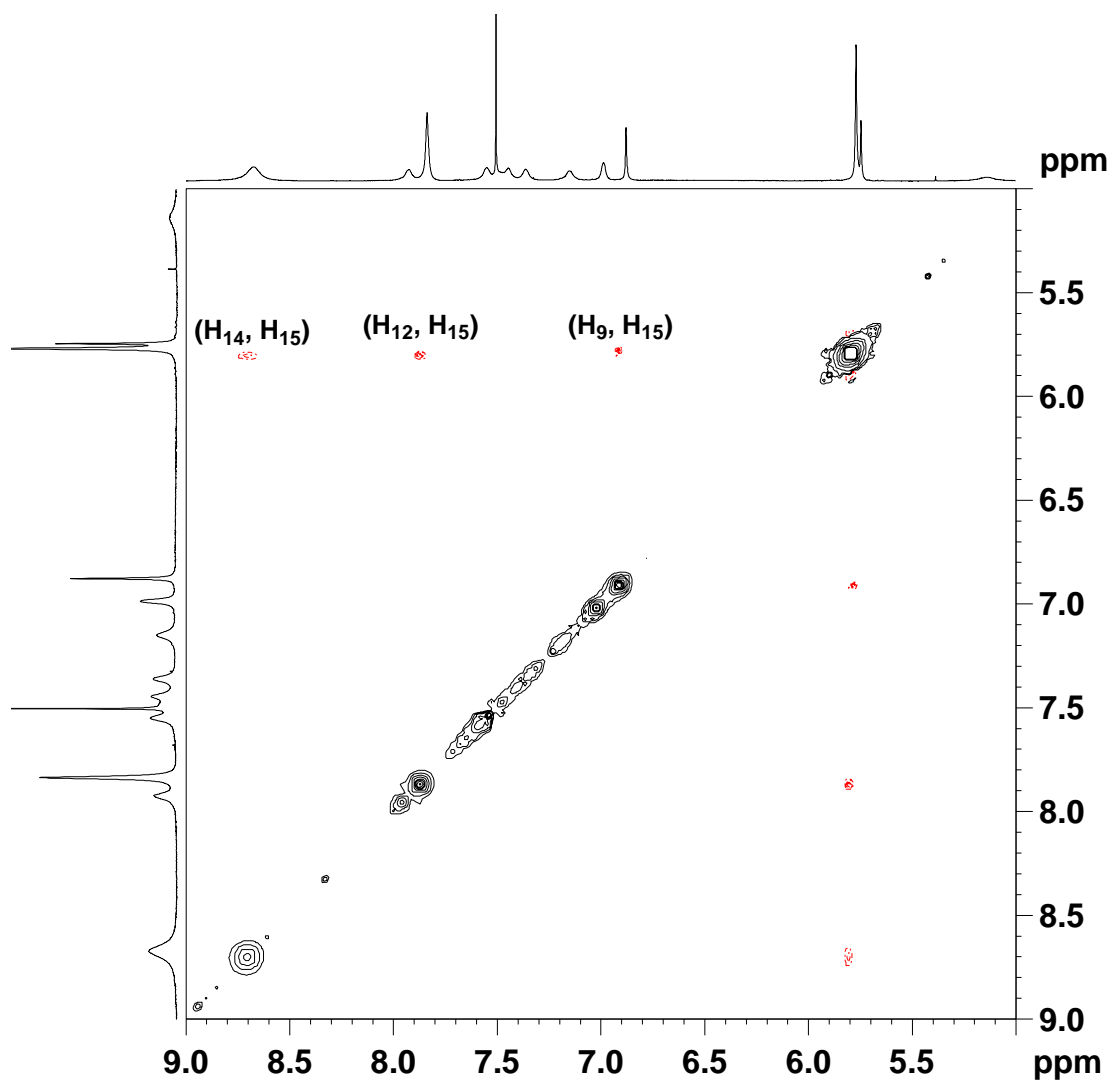

**Fig. S7**  $^1\text{H}$ - $^1\text{H}$  ROESY spectrum (600 MHz,  $\text{CD}_3\text{CN}/\text{CDCl}_3=2$ ) of **2** and 1 equiv of **3**.  $[\mathbf{2}]_0 = 2$  mM.

## 6. Determination of the association constants

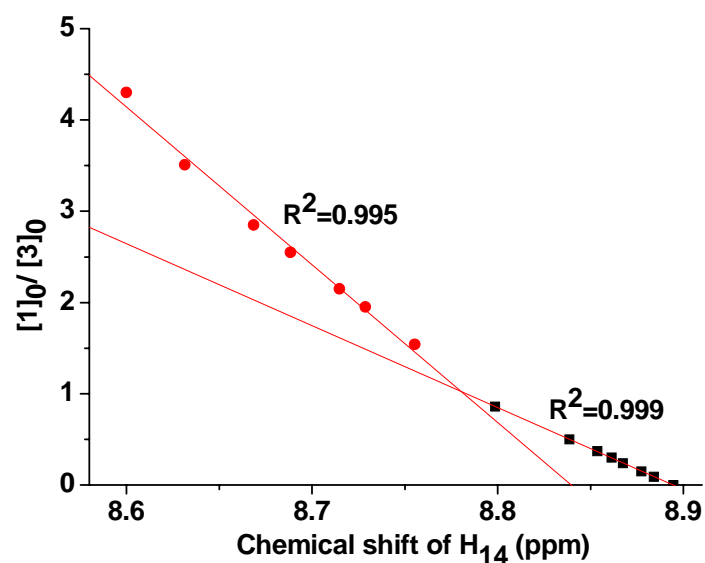

**Fig. S8** Mole ratio plot for the complexation of **1** and **3** in CD<sub>3</sub>CN/CDCl<sub>3</sub> (2:1 v/v) at 298 K.

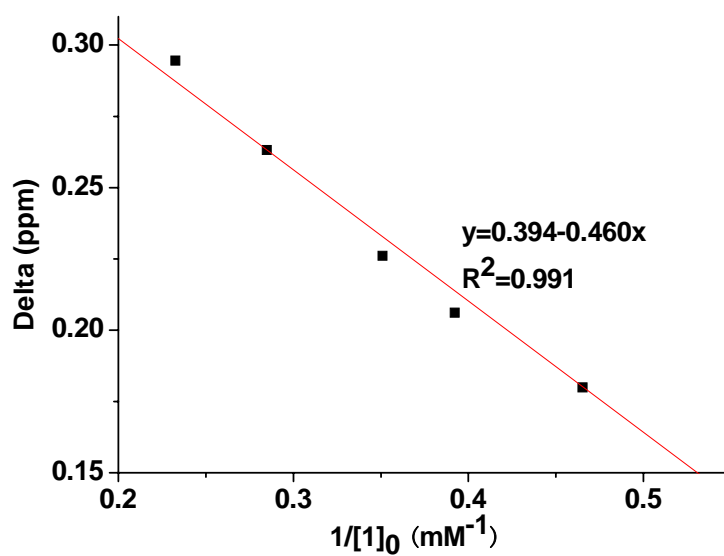

**Fig. S9** Determination of  $\Delta_0$  of H<sub>14</sub> for the complexation of **1** and **3** in CD<sub>3</sub>CN/CDCl<sub>3</sub> (2:1 v/v) at 298 K.

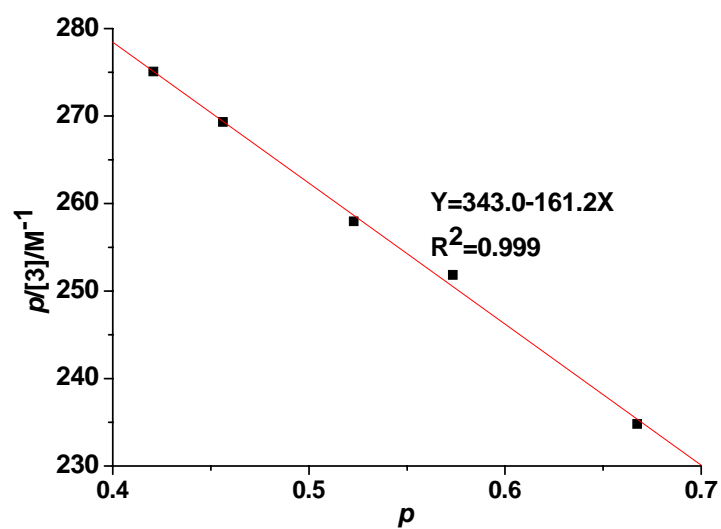

**Fig. S10** Scatchard plot for the complexation of **1** and **3** in  $CD_3CN/CDCl_3$  (2:1 v/v) at 298 K.

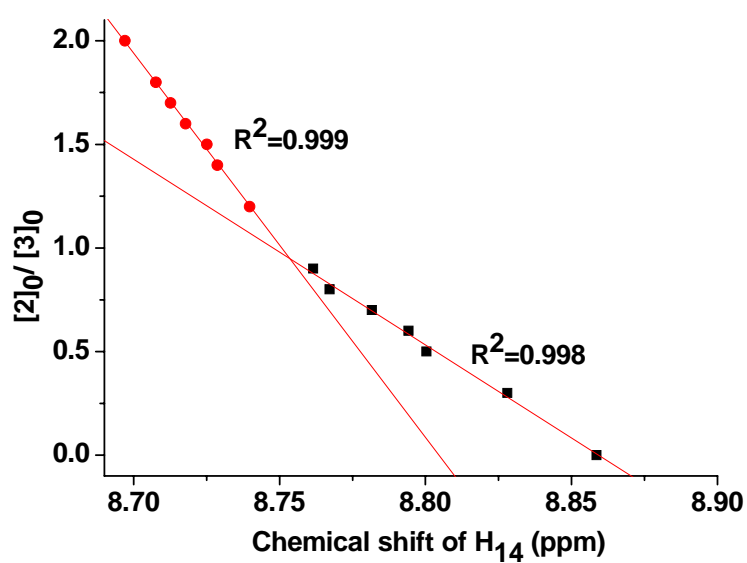

**Fig. S11** Mole ratio plot for the complexation of **2** and **3** in  $CD_3CN/CDCl_3$  (2:1 v/v) at 298 K.

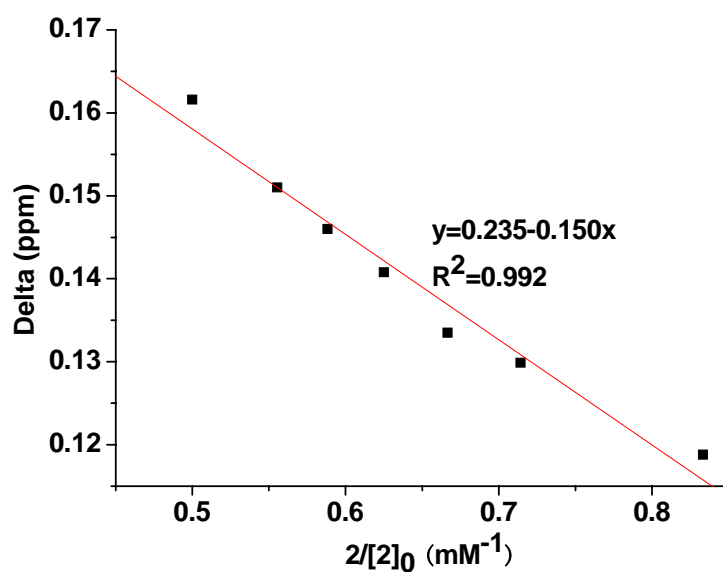

**Fig. S12** Determination of  $\Delta_0$  of  $\text{H}_{14}$  for the complexation of **2** and **3** in  $\text{CD}_3\text{CN}/\text{CDCl}_3$  (2:1 v/v) at 298 K.

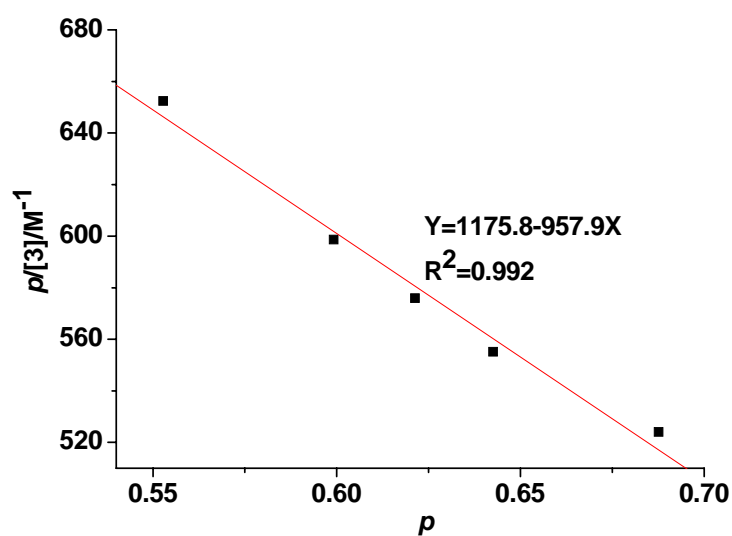

**Fig. S13** Scatchard plot for the complexation of **2** and **3** in  $\text{CD}_3\text{CN}/\text{CDCl}_3$  (2:1 v/v) at 298 K.

## 7. $^1\text{H}$ NMR spectra of complexes **1**·**3** and **2**·**3** at low temperatures

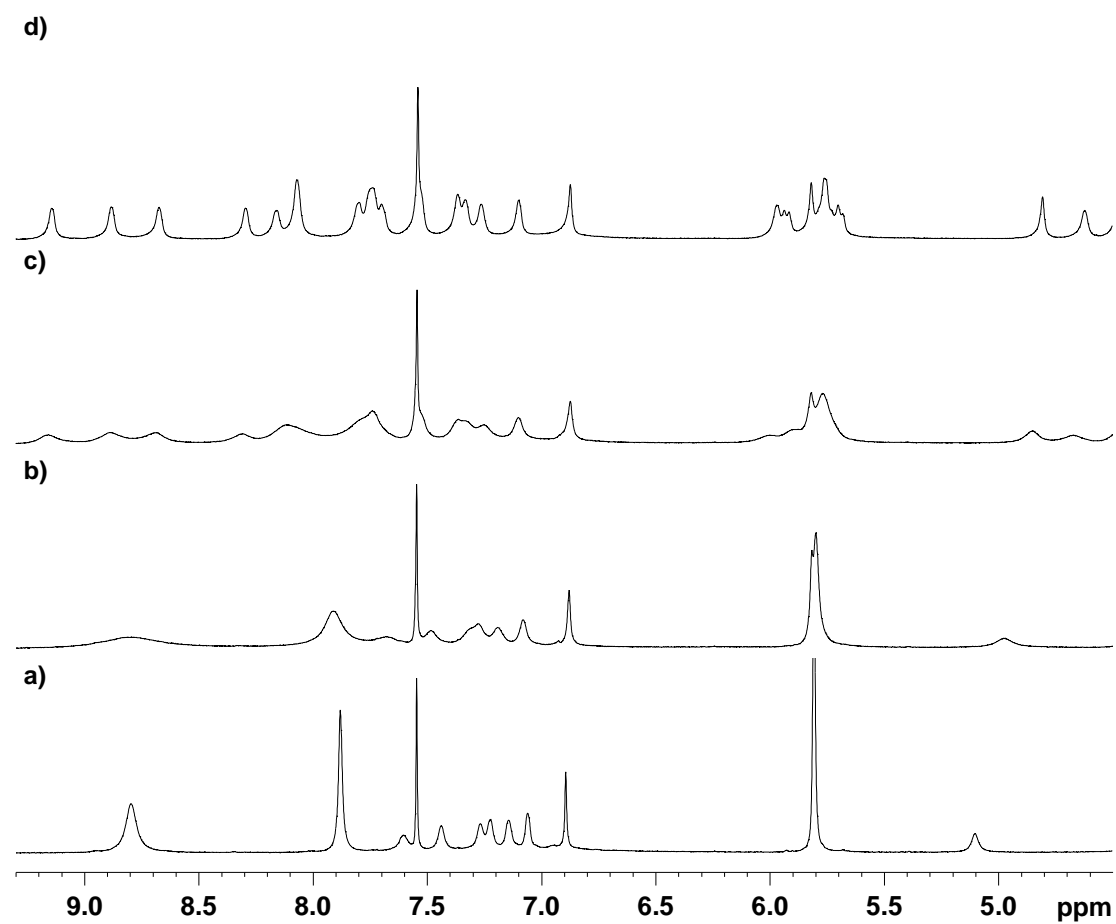

**Fig. S14** Partial  $^1\text{H}$  NMR spectra (600 MHz,  $\text{CD}_3\text{CN}/\text{CDCl}_3=2$ ) of a solution of **1** and 1.0 equiv of **3** at (a) 298 K, (b) 278 K, (c) 258 K, (d) 238 K.  $[\mathbf{1}]_0 = 2.0$  mM.

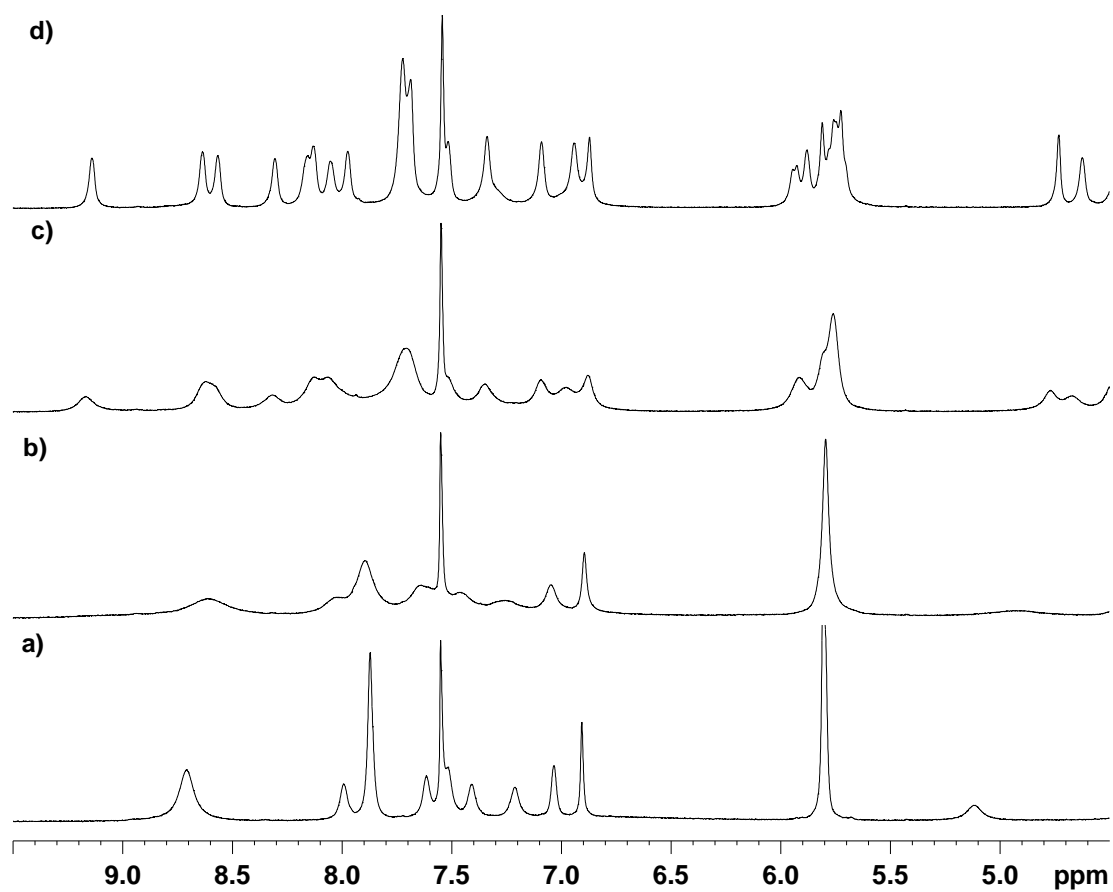

**Fig. S15** Partial  $^1\text{H}$  NMR spectra (600 MHz,  $\text{CD}_3\text{CN}/\text{CDCl}_3=2$ ) of a solution of **2** and 1.0 equiv of **3** at (a) 298 K, (b) 278 K, (c) 258 K, (d) 238 K.  $[\mathbf{2}]_0 = 2.0$  mM.

## 8. ESI-MS spectra of the complexes 1·3 and 2·3

cj-wxnb-hf-P #6-12 RT: 0.09-0.19 AV: 7 NL: 4.63E6  
T: {0,0} + c ESI corona sid=30.00 det=1188.00 Full ms [ 1.00-2000.00]

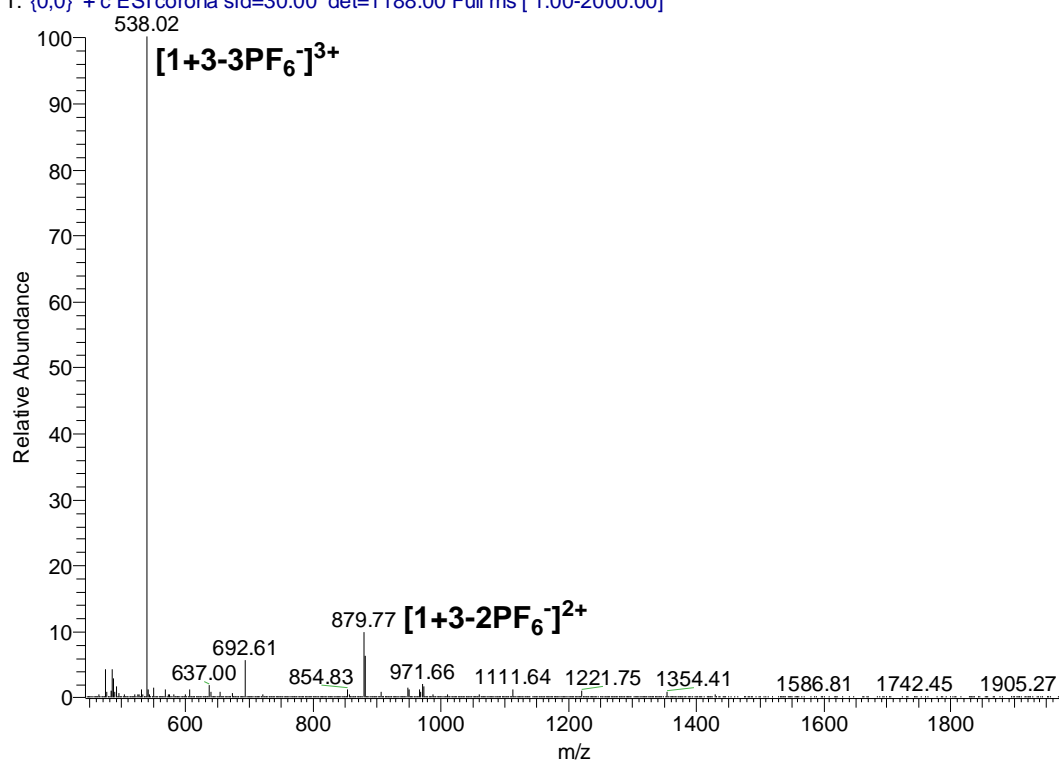

**Fig. S16** ESI-MS spectrum of the complex 1·3.

CJ-WXNN-HF-P #12 RT: 0.19 AV: 1 NL: 1.02E6  
T: {0,0} + c ESI corona sid=30.00 det=1188.00 Full ms [ 1.00-2000.00]

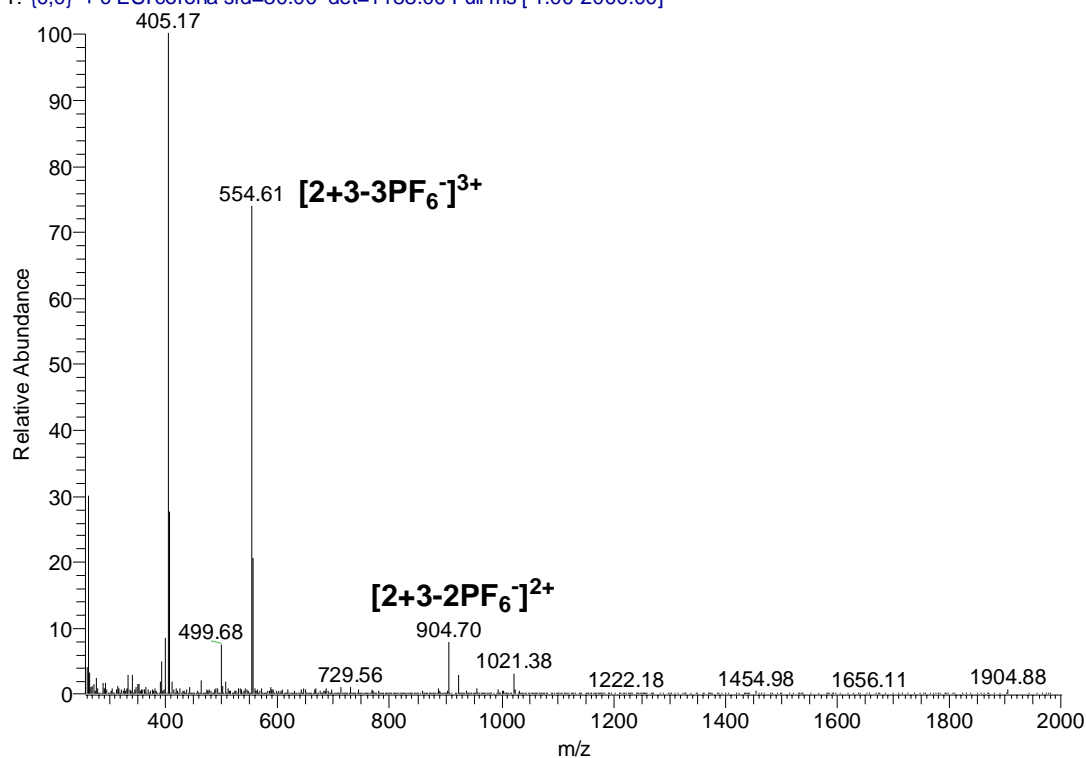

**Fig. S17** ESI-MS spectrum of the complex 2·3.

## 9. Cyclic voltammetry (CV) curves

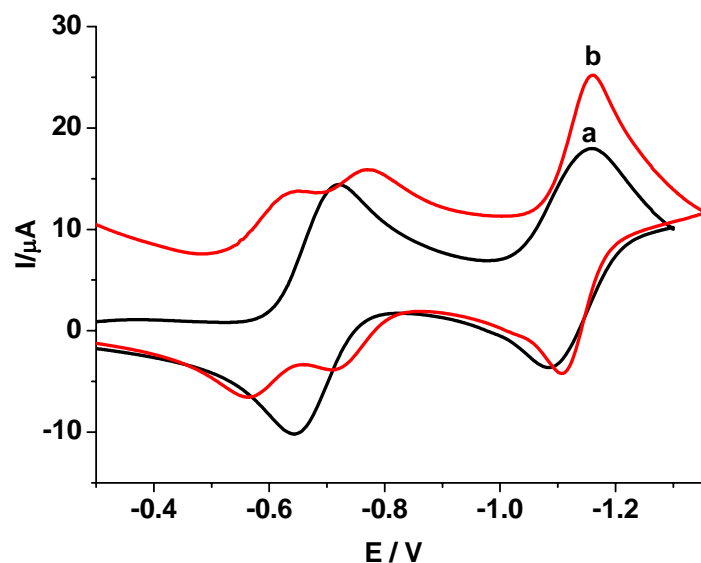

**Fig. S18** CV curves for a solution of  $3^{4+}$  ( $1.0 \times 10^{-3}$  M) in  $\text{CH}_3\text{CN}-(\text{NBu}_4)\text{PF}_6$  (0.1 M) in the absence (black line) and the presence (red line) of **1** ( $3.0 \times 10^{-3}$  M). Working electrode: Pt. Scan rate:  $0.1 \text{ V s}^{-1}$ .

## 10. References

- [S1] J. Cao, H.-Y. Lu, X.-J. You, Q.-Y. Zheng and C.-F. Chen, *Org. Lett.*, 2009, **11**, 4446-4449.
- [S2] J. D. Badjic, C. M. Ronconi, J. F. Stoddart, V. Balzani, S. Silvi and A. Credi, *J. Am. Chem. Soc.*, 2006, **128**, 1489-1499.
- [S3] B. Odell, M. V. Reddington, A. M. Z. Slawin, N. Spencer, J. F. Stoddart and D. J. Williams, *Angew. Chem., Int. Ed. Engl.*, 1988, **27**, 1547-1550.
- [S4] (a) T. Han and C.-F. Chen, *Org. Lett.*, 2006, **8**, 1069-1072; (b) Connors, K. A. *Binding Constants*; J. Wiley and Sons: New York, 1987.
